# Supplementary material for: A Cross-Sectional Study of the Street Foods Purchased by Customers in Urban Areas of Central Asia
Source: MDPI journal article supplement (doi:10.3390/nu13103651), 2021-10-19
Supplement: s1 [file s1]

## Supplementary Materials

**Table S1.** Inter-observer concordance on demographic and anthropometric characteristics and items purchased by the customers observed in street food vending sites of *Dushanbe* (Tajikistan), *Bishkek* (Kyrgyzstan), *Ashgabat* (Turkmenistan) and *Almaty* (Kazakhstan).

|                                 | Overall        |                              | Tajikistan     |                              | Kyrgyzstan     |                              | Turkmenistan   |                              | Kazakhstan     |                              |
|---------------------------------|----------------|------------------------------|----------------|------------------------------|----------------|------------------------------|----------------|------------------------------|----------------|------------------------------|
|                                 | %<br>agreement | Cohen's<br>Kappa<br>(95% CI) |
| CUSTOMERS                       | n=714          |                              | n=81           |                              | n=237          |                              | n=257          |                              | n=139          |                              |
| Sex                             |                |                              |                |                              |                |                              |                |                              |                |                              |
| Male                            | 100.0%         | 1.00<br>(0.93-1.00)          | 100.0%         | 1.00<br>(0.78-1.00)          | 100.0%         | 1.00<br>(0.87-1.00)          | 100.0%         | 1.00<br>(0.88-1.00)          | 100.0%         | 1.00<br>(0.83-1.00)          |
| Female                          |                |                              |                |                              |                |                              |                |                              |                |                              |
| Age                             |                |                              |                |                              |                |                              |                |                              |                |                              |
| <35 years                       | 89.9%          | 0.80<br>(0.72-0.87)          | 82.7%          | 0.65<br>(0.44-0.87)          | 89.0%          | 0.78<br>(0.65-0.91)          | 90.3%          | 0.80<br>(0.68-0.92)          | 94.7%          | 0.89<br>(0.73-1.00)          |
| ≥35 years                       |                |                              |                |                              |                |                              |                |                              |                |                              |
| Weight status                   |                |                              |                |                              |                |                              |                |                              |                |                              |
| Underweight/Normal weight       | 91.9%          | 0.79<br>(0.71-0.86)          | 84.0%          | 0.60<br>(0.39-0.82)          | 90.7%          | 0.71<br>(0.59-0.84)          | 94.2%          | 0.86<br>(0.73-0.98)          | 94.2%          | 0.86<br>(0.69-1.00)          |
| Overweight/obesity              |                |                              |                |                              |                |                              |                |                              |                |                              |
| Purchased at least one food     |                |                              |                |                              |                |                              |                |                              |                |                              |
| Yes                             | 100.0%         | 1.00<br>(0.93-1.00)          | 100.0%         | 1.00<br>(0.78-1.00)          | 100.0%         | 1.00<br>(0.87-1.00)          | 100.0%         | 1.00<br>(0.89-1.00)          | 100.0%         | 1.00<br>(0.83-1.00)          |
| No                              |                |                              |                |                              |                |                              |                |                              |                |                              |
| Purchased at least one beverage |                |                              |                |                              |                |                              |                |                              |                |                              |
| Yes                             | 99.2%          | 0.98<br>(0.91-1.00)          | 95.1%          | 0.88<br>(0.66-1.00)          | 99.2%          | 0.98<br>(0.86-1.00)          | 100.0%         | 1.00<br>(0.88-1.00)          | 100.0%         | 1.00<br>(0.83-1.00)          |
| No                              |                |                              |                |                              |                |                              |                |                              |                |                              |
| Number of items purchased       |                |                              |                |                              |                |                              |                |                              |                |                              |
| One (median)                    | 99.7%          | 0.99<br>(0.93-1.00)          | 98.8%          | 0.96<br>(0.74-1.00)          | 100.0%         | 1.00<br>(0.87-1.00)          | 99.6%          | 0.99<br>(0.86-1.00)          | 100.0%         | 1.00<br>(0.83-1.00)          |
| More than one                   |                |                              |                |                              |                |                              |                |                              |                |                              |
| ITEMS                           | n=852          |                              | n=101          |                              | n=276          |                              | n=310          |                              | n=165          |                              |
| Item purchased                  | 97.6%          | 0.98<br>(0.97-0.99)          | 97.9%          | 0.98<br>(0.93-1.00)          | 94.5%          | 0.94<br>(0.92-0.96)          | 99.7%          | 1.00<br>(0.97-1.00)          | 98.8%          | 0.99<br>(0.96-1.00)          |
| Quantity purchased              | 95.3%          | 0.94<br>(0.92-0.97)          | 92.6%          | 0.89<br>(0.79-0.99)          | 94.5%          | 0.93<br>(0.89-0.98)          | 96.8%          | 0.96<br>(0.92-1.00)          | 95.2%          | 0.94<br>(0.87-1.00)          |

95% CI: 95% confidence interval.

**Table S2.** Decision rules for the elimination of conflicts of observation regarding food items and quantities purchased.

| Type of disagreement                                                                               | Criteria used                                                                                                               | Example                                                                                                                                                                                                                                                       |
|----------------------------------------------------------------------------------------------------|-----------------------------------------------------------------------------------------------------------------------------|---------------------------------------------------------------------------------------------------------------------------------------------------------------------------------------------------------------------------------------------------------------|
| <b>Disagreements on the food item purchased</b>                                                    |                                                                                                                             |                                                                                                                                                                                                                                                               |
| The two observers registered two different food items (n=5).                                       | Conflicting food items were checked for its availability on the corresponding vending site.*                                | Observer A registered “coffee” and observer B registered “tea”. The corresponding vending site did not have coffee available. It was assumed that the customer purchased tea.                                                                                 |
| The two observers registered the same food item, but with different degrees of specificity (n=15). | The broadest observation was assumed.                                                                                       | Observer A registered “samosa” and observer B registered “chicken samosa”. It was assumed that the customer purchased samosa.                                                                                                                                 |
| The two observers registered a different number of food items (n=10).                              | The most complete observation was assumed, unless the conflicting item was not available in the corresponding vending site. | Observer A registered “samosa” and observer B registered “samosa” and “tea”. It was assumed that the customer purchased samosa and tea. If the corresponding vending site did not have tea available, it would be assumed that the customer purchased samosa. |
| <b>Disagreements on the quantity purchased</b>                                                     |                                                                                                                             |                                                                                                                                                                                                                                                               |
| The two observers registered the same food item, but different quantities (n=40).                  | The average quantity between the two observations was assumed.                                                              | Observer A registered 200mL of tea and observer B registered 300mL of tea. It was assumed that the customer purchased 250mL of tea.                                                                                                                           |

\*Observations should be excluded in the cases where the availability criterion does not solve the conflict: (1) if the conflicting food items are both available at the corresponding vending site; or (2) if none of the conflicting food items are available at the corresponding vending site. These particular situations did not occur.

**Table S3.** Ready-to-eat foods and beverages purchased by the street food customers observed in *Dushanbe* (Tajikistan), *Bishkek* (Kyrgyzstan), *Ashgabat* (Turkmenistan) and *Almaty* (Kazakhstan), overall and by sex, age and weight status.

|                                              | Total |      | Sex   |      |        |      | p     | Age <sup>a</sup> |      |           |      | p     | Weight status <sup>a</sup> |      |                     |      | p     |
|----------------------------------------------|-------|------|-------|------|--------|------|-------|------------------|------|-----------|------|-------|----------------------------|------|---------------------|------|-------|
|                                              |       |      | Male  |      | Female |      |       | <35 years        |      | ≥35 years |      |       | Underweight /normal        |      | Overweight /obesity |      |       |
|                                              | n     | %    | n     | %    | n      | %    |       | n                | %    | n         | %    |       | n                          | %    | n                   | %    |       |
| Tajikistan                                   | n=81  |      | n=53  |      | n=28   |      |       | n=38             |      | n=29      |      |       | n=52                       |      | n=16                |      |       |
| Foods <sup>b</sup>                           | 62    | 76.5 | 40    | 75.5 | 22     | 78.6 | 0.754 | 31               | 81.6 | 21        | 72.4 | 0.373 | 41                         | 78.8 | 10                  | 62.5 | 0.187 |
| Savoury pastries and snacks                  | 21    | 25.9 | 13    | 24.5 | 8      | 28.6 | 0.693 | 13               | 34.2 | 3         | 10.3 | 0.023 | 15                         | 28.8 | 2                   | 12.5 | 0.187 |
| Main dishes                                  | 9     | 11.1 | 5     | 9.4  | 4      | 14.3 | 0.509 | 4                | 10.5 | 5         | 17.2 | 0.425 | 4                          | 7.7  | 2                   | 12.5 | 0.553 |
| Sweet pastries and confectionery             | 10    | 12.4 | 8     | 15.1 | 2      | 7.2  | 0.301 | 8                | 21.1 | 2         | 6.9  | 0.107 | 9                          | 17.3 | 0                   | 0.0  | 0.074 |
| Breads                                       | 21    | 25.9 | 13    | 24.5 | 8      | 28.6 | 0.693 | 7                | 18.4 | 13        | 44.8 | 0.019 | 10                         | 19.2 | 7                   | 43.8 | 0.048 |
| Sandwiches                                   | 1     | 1.2  | 1     | 1.9  | 0      | 0.0  | 0.465 | 1                | 2.6  | 0         | 0.0  | 0.379 | 1                          | 1.9  | 0                   | 0.0  | 0.576 |
| Fruit                                        | 4     | 4.9  | 3     | 5.7  | 1      | 3.6  | 0.680 | 0                | 0.0  | 0         | 0.0  | -     | 4                          | 7.7  | 0                   | 0.0  | 0.253 |
| Beverages <sup>b</sup>                       | 26    | 32.1 | 18    | 34.0 | 8      | 28.6 | 0.621 | 13               | 34.2 | 8         | 27.6 | 0.562 | 16                         | 30.8 | 8                   | 50.0 | 0.159 |
| Tea and coffee                               | 4     | 4.9  | 2     | 3.8  | 2      | 7.1  | 0.506 | 4                | 10.5 | 0         | 0.0  | 0.072 | 4                          | 7.7  | 0                   | 0.0  | 0.253 |
| Soft drinks and juices                       | 15    | 18.5 | 11    | 20.8 | 4      | 14.3 | 0.476 | 6                | 15.8 | 6         | 20.7 | 0.604 | 7                          | 13.5 | 7                   | 43.8 | 0.009 |
| Fermented traditional beverages <sup>c</sup> | 2     | 2.5  | 2     | 3.8  | 0      | 0.0  | 0.298 | 2                | 5.3  | 0         | 0.0  | 0.210 | 2                          | 3.8  | 0                   | 0.0  | 0.426 |
| Water                                        | 3     | 3.7  | 1     | 1.9  | 2      | 7.1  | 0.234 | 1                | 2.6  | 1         | 3.4  | 0.846 | 2                          | 3.8  | 0                   | 0.0  | 0.426 |
| Alcoholic beverages <sup>d</sup>             | 2     | 2.5  | 2     | 3.8  | 0      | 0.0  | 0.298 | 0                | 0.0  | 1         | 3.4  | 0.249 | 1                          | 1.9  | 1                   | 6.3  | 0.370 |
| Milk                                         | 0     | 0.0  | 0     | 0.0  | 0      | 0.0  | -     | 0                | 0.0  | 0         | 0.0  | -     | 0                          | 0.0  | 0                   | 0.0  | -     |
| Kyrgyzstan                                   | n=237 |      | n=96  |      | n=141  |      |       | n=101            |      | n=110     |      |       | n=178                      |      | n=37                |      |       |
| Foods <sup>b</sup>                           | 158   | 66.7 | 59    | 61.5 | 99     | 70.2 | 0.160 | 68               | 67.3 | 72        | 65.5 | 0.774 | 121                        | 68.0 | 25                  | 67.6 | 0.961 |
| Savoury pastries and snacks                  | 56    | 23.6 | 19    | 19.8 | 37     | 26.2 | 0.251 | 24               | 23.8 | 26        | 23.6 | 0.983 | 42                         | 23.6 | 11                  | 29.7 | 0.431 |
| Main dishes                                  | 48    | 20.3 | 22    | 22.9 | 26     | 18.4 | 0.400 | 24               | 23.8 | 17        | 15.5 | 0.128 | 42                         | 23.6 | 3                   | 8.1  | 0.035 |
| Sweet pastries and confectionery             | 22    | 9.3  | 5     | 5.2  | 17     | 12.1 | 0.075 | 9                | 8.9  | 12        | 10.9 | 0.628 | 13                         | 7.3  | 8                   | 21.6 | 0.008 |
| Breads                                       | 22    | 9.3  | 6     | 6.3  | 16     | 11.3 | 0.184 | 4                | 4.0  | 14        | 12.7 | 0.023 | 17                         | 9.6  | 3                   | 8.1  | 0.783 |
| Sandwiches                                   | 16    | 6.8  | 9     | 9.4  | 7      | 5.0  | 0.184 | 10               | 9.9  | 5         | 4.5  | 0.130 | 12                         | 6.7  | 1                   | 2.7  | 0.348 |
| Fruit                                        | 0     | 0.0  | 0     | 0.0  | 0      | 0.0  | -     | 0                | 0.0  | 0         | 0.0  | -     | 0                          | 0.0  | 0                   | 0.0  | -     |
| Beverages <sup>b</sup>                       | 106   | 44.7 | 51    | 53.1 | 55     | 39.0 | 0.032 | 47               | 46.5 | 50        | 45.5 | 0.875 | 78                         | 43.8 | 16                  | 43.2 | 0.949 |
| Tea and coffee                               | 51    | 21.5 | 21    | 21.9 | 30     | 21.3 | 0.912 | 23               | 22.8 | 24        | 21.8 | 0.868 | 37                         | 20.8 | 8                   | 21.6 | 0.910 |
| Soft drinks and juices                       | 24    | 10.1 | 13    | 13.5 | 11     | 7.8  | 0.150 | 13               | 12.9 | 9         | 8.2  | 0.266 | 19                         | 10.7 | 1                   | 2.7  | 0.129 |
| Fermented traditional beverages <sup>c</sup> | 21    | 8.9  | 11    | 11.5 | 10     | 7.1  | 0.246 | 8                | 7.9  | 13        | 11.8 | 0.345 | 16                         | 9.0  | 3                   | 8.1  | 0.864 |
| Water                                        | 1     | 0.4  | 0     | 0.0  | 1      | 0.7  | 0.408 | 1                | 1.0  | 0         | 0.0  | 0.296 | 0                          | 0.0  | 1                   | 2.7  | 0.028 |
| Alcoholic beverages <sup>d</sup>             | 8     | 3.4  | 5     | 5.2  | 3      | 2.1  | 0.197 | 2                | 2.0  | 4         | 3.6  | 0.470 | 5                          | 2.8  | 3                   | 8.1  | 0.121 |
| Milk                                         | 1     | 0.4  | 1     | 1.0  | 0      | 0.0  | 0.225 | 0                | 0.0  | 0         | 0.0  | -     | 1                          | 0.6  | 0                   | 0.0  | 0.648 |
| Turkmenistan                                 | n=257 |      | n=119 |      | n=138  |      |       | n=97             |      | n=135     |      |       | n=178                      |      | n=64                |      |       |
| Foods <sup>b</sup>                           | 242   | 94.2 | 112   | 94.1 | 130    | 94.2 | 0.977 | 92               | 94.8 | 127       | 94.1 | 0.801 | 167                        | 93.8 | 60                  | 93.8 | 0.984 |
| Savoury pastries and snacks                  | 60    | 23.4 | 31    | 26.1 | 29     | 21.0 | 0.341 | 30               | 30.9 | 26        | 19.3 | 0.040 | 46                         | 25.8 | 11                  | 17.1 | 0.162 |

|                                              |       |      |      |      |      |      |              |      |      |      |      |              |      |      |      |      |       |
|----------------------------------------------|-------|------|------|------|------|------|--------------|------|------|------|------|--------------|------|------|------|------|-------|
| Main dishes                                  | 49    | 19.1 | 18   | 15.1 | 31   | 22.5 | 0.135        | 17   | 17.5 | 28   | 20.7 | 0.541        | 32   | 18.0 | 14   | 21.9 | 0.496 |
| Sweet pastries and confectionery             | 67    | 26.1 | 26   | 21.9 | 41   | 29.7 | 0.152        | 23   | 23.7 | 40   | 29.6 | 0.317        | 44   | 24.7 | 19   | 29.7 | 0.437 |
| Breads                                       | 49    | 19.1 | 28   | 23.5 | 21   | 15.2 | 0.091        | 15   | 15.5 | 29   | 21.5 | 0.249        | 34   | 19.1 | 12   | 18.8 | 0.951 |
| Sandwiches                                   | 25    | 9.7  | 10   | 8.4  | 15   | 10.9 | 0.506        | 10   | 10.3 | 9    | 6.7  | 0.318        | 17   | 9.6  | 6    | 9.4  | 0.967 |
| Fruit                                        | 4     | 1.6  | 2    | 1.7  | 2    | 1.5  | 0.881        | 2    | 2.1  | 2    | 1.5  | 0.738        | 3    | 1.7  | 1    | 1.6  | 0.947 |
| <b>Beverages<sup>b</sup></b>                 | 35    | 13.6 | 19   | 16.0 | 16   | 11.6 | 0.308        | 17   | 17.5 | 16   | 11.9 | 0.222        | 26   | 14.6 | 8    | 12.5 | 0.677 |
| Tea and coffee                               | 9     | 3.5  | 6    | 5.0  | 3    | 2.2  | 0.212        | 4    | 4.1  | 5    | 3.7  | 0.870        | 7    | 3.9  | 1    | 1.6  | 0.363 |
| Soft drinks and juices                       | 21    | 8.2  | 12   | 10.1 | 9    | 6.5  | 0.299        | 13   | 13.4 | 6    | 4.4  | <b>0.014</b> | 16   | 9.0  | 5    | 7.8  | 0.774 |
| Fermented traditional beverages <sup>c</sup> | 3     | 1.2  | 1    | 0.8  | 2    | 1.5  | 0.650        | 0    | 0.0  | 3    | 2.2  | 0.139        | 1    | 0.6  | 2    | 3.1  | 0.112 |
| Water                                        | 3     | 1.2  | 1    | 0.8  | 2    | 1.5  | 0.650        | 0    | 0.0  | 3    | 2.2  | 0.139        | 3    | 1.7  | 0    | 0.0  | 0.296 |
| Alcoholic beverages <sup>d</sup>             | 0     | 0.0  | 0    | 0.0  | 0    | 0.0  | -            | 0    | 0.0  | 0    | 0.0  | -            | 0    | 0.0  | 0    | 0.0  | -     |
| Milk                                         | 0     | 0.0  | 0    | 0.0  | 0    | 0.0  | -            | 0    | 0.0  | 0    | 0.0  | -            | 0    | 0.0  | 0    | 0.0  | -     |
| <b>Kazakhstan</b>                            | n=139 |      | n=42 |      | n=97 |      |              | n=50 |      | n=82 |      |              | n=95 |      | n=36 |      |       |
| <b>Foods<sup>b</sup></b>                     | 102   | 73.4 | 31   | 73.8 | 71   | 73.2 | 0.940        | 35   | 70.0 | 61   | 74.4 | 0.583        | 69   | 72.6 | 27   | 75.0 | 0.784 |
| Savoury pastries and snacks                  | 29    | 20.7 | 6    | 14.3 | 23   | 23.7 | 0.209        | 13   | 26.0 | 14   | 17.1 | 0.217        | 21   | 22.1 | 7    | 19.4 | 0.740 |
| Main dishes                                  | 30    | 21.6 | 12   | 28.6 | 18   | 18.6 | 0.188        | 8    | 16.0 | 20   | 24.4 | 0.253        | 15   | 15.8 | 11   | 30.6 | 0.059 |
| Sweet pastries and confectionery             | 29    | 20.9 | 7    | 16.7 | 22   | 22.7 | 0.423        | 10   | 20.0 | 19   | 23.2 | 0.670        | 24   | 25.3 | 5    | 13.9 | 0.162 |
| Breads                                       | 10    | 7.2  | 3    | 7.1  | 7    | 7.2  | 0.988        | 1    | 2.0  | 7    | 8.5  | 0.127        | 6    | 6.3  | 2    | 5.6  | 0.871 |
| Sandwiches                                   | 5     | 3.6  | 4    | 9.5  | 1    | 1.0  | <b>0.014</b> | 4    | 8.0  | 1    | 1.2  | <b>0.048</b> | 3    | 3.2  | 2    | 5.6  | 0.523 |
| Fruit                                        | 0     | 0.0  | 0    | 0.0  | 0    | 0.0  | -            | 0    | 0.0  | 0    | 0.0  | -            | 0    | 0.0  | 0    | 0.0  | -     |
| <b>Beverages<sup>b</sup></b>                 | 54    | 38.9 | 19   | 45.2 | 35   | 36.1 | 0.309        | 26   | 52.0 | 27   | 32.9 | <b>0.030</b> | 39   | 41.1 | 12   | 33.3 | 0.419 |
| Tea and coffee                               | 17    | 12.2 | 5    | 11.9 | 12   | 12.4 | 0.939        | 5    | 10.0 | 12   | 14.6 | 0.441        | 10   | 10.5 | 5    | 13.9 | 0.589 |
| Soft drinks and juices                       | 10    | 7.2  | 3    | 7.1  | 7    | 7.2  | 0.988        | 4    | 8.0  | 6    | 7.3  | 0.886        | 8    | 8.4  | 2    | 5.6  | 0.581 |
| Fermented traditional beverages <sup>c</sup> | 7     | 5.0  | 3    | 7.1  | 4    | 4.1  | 0.455        | 5    | 10.0 | 2    | 2.4  | 0.060        | 5    | 5.3  | 2    | 5.6  | 0.947 |
| Water                                        | 18    | 13.0 | 7    | 16.7 | 11   | 11.3 | 0.390        | 12   | 24.0 | 5    | 6.1  | <b>0.003</b> | 15   | 15.8 | 3    | 8.3  | 0.268 |
| Alcoholic beverages <sup>d</sup>             | 2     | 1.4  | 1    | 2.4  | 1    | 1.0  | 0.539        | 0    | 0.0  | 2    | 2.4  | 0.266        | 1    | 1.1  | 0    | 0.0  | 0.537 |
| Milk                                         | 2     | 1.4  | 0    | 0.0  | 2    | 2.1  | 0.349        | 0    | 0.0  | 2    | 2.4  | 0.266        | 2    | 2.1  | 0    | 0.0  | 0.380 |

Values in bold represent statistically significant differences according to Chi-squared test with a significance level of 0.05.

<sup>a</sup>For the variables age and weight status, the data presented corresponds to the customers in which there was agreement between observers (Tajikistan: n=67 and n=68; Kyrgyzstan: n=211 and n=215; Turkmenistan: n=232 and n=242; Kazakhstan: n=132 and n=131).

<sup>b</sup>The sum of the values for each sub-category may be higher than the total N of the respective category, because the same customer could buy more than one food item.

<sup>c</sup>Fermented traditional beverages included *ayran* (dairy-based fermented beverage made from sheep's milk), *chalap* (beverage made from fermented milk, salt and carbonated water;), *dugob* (fermented beverage made with sour milk or buttermilk), *kefir* (fermented milk drink prepared by inoculating cow, goat or sheep milk with kefir grains), *maksym* (fermented beverage made from grain, usually malt), *tamshan* (mix of *maksym* and *chalap*), *kozhe* (cold drink made by boiling rice, millet or pearl barley with a mixture of dairy products such as *ayran* or *kefir*) and Yoghurt.

<sup>d</sup>Alcoholic beverages included beer, vodka and some traditional beverages with a low alcohol content, such as *kvass* (a fermented beverage made from rye bread), *bozo* (a fermented beverage made from millet) and *kymyz* (a fermented product made from mare's milk).
